# Supplementary material
Source: PubMed Central journal article supplement (PMC2397457)
Supplement: M708962200_1.pdf [file M708962200_1.pdf]

TABLE S1

Plasmids used in this study

| Plasmid                            | Source, reference, or description of construction                                                                                                                                                                                                                                                                                                                                                                                |
|------------------------------------|----------------------------------------------------------------------------------------------------------------------------------------------------------------------------------------------------------------------------------------------------------------------------------------------------------------------------------------------------------------------------------------------------------------------------------|
| pET-21b                            | Novagen                                                                                                                                                                                                                                                                                                                                                                                                                          |
| pET-42b                            | Novagen                                                                                                                                                                                                                                                                                                                                                                                                                          |
| pXJ58                              | (1)                                                                                                                                                                                                                                                                                                                                                                                                                              |
| pID2                               | <i>spoIIGA</i> was amplified by PCR using genomic DNA of <i>B. subtilis</i> PY79 (2) as template and primers IIGA-FN and IIGA-RB. <i>gfp</i> was amplified by PCR using pXJ58 as template and primers <i>gfp</i> -FB and <i>gfp</i> -RX. <i>NdeI</i> - <i>Bam</i> HI-digested <i>spoIIGA</i> fragment and <i>Bam</i> HI- <i>Xho</i> I-digested <i>gfp</i> fragment were cloned into <i>NdeI</i> - <i>Xho</i> I-digested pET-21b. |
| pID15                              | <i>spoIIR</i> and <i>sigE</i> were amplified by PCR using genomic DNA of <i>B. subtilis</i> PY79 (2) as template and primers IIR-FN and IIR-RF2B, and <i>sigE</i> -FrbsB and <i>sigE</i> -RX, respectively. <i>NdeI</i> - <i>Bam</i> HI-digested <i>spoIIR</i> fragment and <i>Bam</i> HI- <i>Xho</i> I-digested <i>rbs-sigE</i> fragment were cloned into <i>NdeI</i> - <i>Xho</i> I-digested pET-42b.                          |
| pID16                              | <i>spoIIGA</i> and <i>gfp</i> were amplified by PCR using pID2 as template and primers IIGA-FN and IIGA-RE, and <i>gfp</i> -FE and His-RB, respectively. <i>NdeI</i> - <i>Eco</i> RI-digested <i>spoIIGA</i> and <i>Eco</i> RI- <i>Bam</i> HI-digested <i>gfp</i> were cloned into <i>NdeI</i> - <i>Bam</i> HI-digested pID15.                                                                                                   |
| pID17                              | <i>spoIIR</i> was amplified by PCR using pID15 as template and primers IIR-FN and IIR-RX. <i>NdeI</i> - <i>Xho</i> I-digested <i>spoIIR</i> fragment was cloned into <i>NdeI</i> - <i>Xho</i> I-digested pET-21b.                                                                                                                                                                                                                |
| pID44                              | pID15 was subjected to site-directed mutagenesis using primers <i>sigE</i> (M17I)-F and <i>sigE</i> (M17I)-R.                                                                                                                                                                                                                                                                                                                    |
| pID48                              | <i>spoIIGA-gfp</i> was amplified by PCR using pID2 as template and primers IIGA-FN and <i>gfp</i> -RF2X. <i>NdeI</i> - <i>Bam</i> HI-digested and gel-extracted <i>spoIIGA</i> fragment and <i>Bam</i> HI- <i>Xho</i> I-digested and gel-extracted <i>gfp</i> -F2 fragment were cloned into <i>NdeI</i> - <i>Xho</i> I-digested pET-21b.                                                                                         |
| pID49                              | pID15 was subjected to site-directed mutagenesis using primers <i>Bam</i> HItoSTOP-F and <i>Bam</i> HItoSTOP-R.                                                                                                                                                                                                                                                                                                                  |
| pID50                              | pID49 was subjected to site-directed mutagenesis using primers <i>sigE</i> (M17I)-F and <i>sigE</i> (M17I)-R.                                                                                                                                                                                                                                                                                                                    |
| pID53 to pID86 and pID89 to pID107 | pID48 was subjected to site-directed mutagenesis using primers indicated in Table S2.                                                                                                                                                                                                                                                                                                                                            |
| pID87                              | <i>rbs-spoIIGA-gfp</i> was amplified by PCR using pID2 as template and primers IIGA-FrbsX and <i>gfp</i> -RX. <i>Xho</i> I-digested <i>rbs-spoIIGA-gfp</i> was cloned into <i>Xho</i> I-digested pID48.                                                                                                                                                                                                                          |
| pID88                              | <i>spoIIR</i> -F2 fragment from <i>NdeI</i> - <i>Bam</i> HI-digested pID15 was gel extracted and cloned into <i>NdeI</i> - <i>Bam</i> HI-digested pET-42b.                                                                                                                                                                                                                                                                       |

TABLE S2

*Primers used in this study*

| Primer        | Sequence <sup>a</sup>                                                                  |
|---------------|----------------------------------------------------------------------------------------|
| IIGA-FN       | 5'-ggaattccatagaaaatctatttagatgtcatttgg-3'                                             |
| IIGA-RB       | 5'-cgcgatcctgaaacgtgttgacagcctt-3'                                                     |
| gfp-FB        | 5'-cgcgatccagtaaaggagaagaactttcac-3'                                                   |
| gfp-RX        | 5'-ccgctcgagttgtatagttcatccatgcca-3'                                                   |
| IIR-FN        | 5'-ggaattccatagaaaaaacagtaatcattgtatata-3'                                             |
| IIR-RF2B      | 5'ggatccacttgtcatcgtcatccttgaatccttgtcatcgtcatccttgaatcggaaaa<br>aggtcggaaatcca-3'     |
| sigE-FrbsB    | 5'-ggatccaagaagggatagatagatagaaaaactgaaattacggtgac-3'                                  |
| sigE-RX       | 5'-ccgctcgagcaccattttgtgaactcttttc-3'                                                  |
| IIGA-RE       | 5'-ccggaattctgaaacgtgttgacagcctt-3'                                                    |
| gfp-FE        | 5'-gaattcagtaaaggagaagaactttcac-3'                                                     |
| His-RB        | 5'-cgcgatcctagcagccggatctcagtg-3'                                                      |
| IIR-RX        | 5'-ccgctcgagggaaaaagggtcggaaatcca-3'                                                   |
| sigE(M17I)-F  | 5'-tataagctgctgattaacttgggctg-3'                                                       |
| sigE(M17I)-R  | 5'-cagcccaagtttaacagcagcttata-3'                                                       |
| gfp-RF2X      | 5'ctcgagctacttgtcatcgtcatccttgaatccttgtcatcgtcatccttgaatctttgtatag<br>ttcatccatgcca-3' |
| BamHItoSTOP-F | 5'-gatgacaagtaggtagccaagaagggat-3'                                                     |
| BamHItoSTOP-R | 5'-atcccttcttggtacctacttgcac-3'                                                        |
| IIGA-FrbsX    | 5'-ctcgagagaagggatagatagatagaaaatctatttagatgtcatttgg-3'                                |
| IIGA(D183A)-F | 5'-aggcctgattgcttccggtaacc-3' (pID53) <sup>b</sup>                                     |
| IIGA(D183A)-R | 5'-ggttaccggaagcaatcaggcct-3'                                                          |
| IIGA(D183E)-F | 5'-aggcctgattgagtcggtaacc-3' (pID54)                                                   |
| IIGA(D183E)-R | 5'-ggttaccggaactcaatcaggcct-3'                                                         |
| IIGA(S184A)-F | 5'-ggcctgattgatgccgtaaccagctg-3' (pID55)                                               |
| IIGA(S184A)-R | 5'-cagctggttaccgcaatcaatcaggcc-3'                                                      |
| IIGA(S184C)-F | 5'-ggcctgattgattgcggtaaccagctg-3' (pID56)                                              |
| IIGA(S184C)-R | 5'-cagctggttaccgcaatcaatcaggcc-3'                                                      |
| IIGA(S184T)-F | 5'-ggcctgattgataccgtaaccagctg-3' (pID57)                                               |
| IIGA(S184T)-R | 5'-cagctggttaccggtatcaatcaggcc-3'                                                      |
| IIGA(G185A)-F | 5'-ctgattgattccgtaaccagctgtac-3' (pID58)                                               |

|               |                                                    |
|---------------|----------------------------------------------------|
| IIGA(G185A)-R | 5'-gtacagctggttagcggaaatcaatcag-3'                 |
| IIGA(D6A)-F   | 5'-aaaatctatttagctgtcatttggctg-3' (pID59)          |
| IIGA(D6A)-R   | 5'-cagccaaatgacagctaaatagatttt-3'                  |
| IIGA(D6E)-F   | 5'-aaaatctatttagaggtcatttggctg-3' (pID60)          |
| IIGA(D6E)-R   | 5'-cagccaaatgacctctaaatagatttt-3'                  |
| IIGA(H177A)-F | 5'-agccaaacactt <b>gct</b> gtcagaggcc-3' (pID61)   |
| IIGA(H177A)-R | 5'-ggcctctgacag <b>ca</b> agtgttggct-3'            |
| IIGA(H261A)-F | 5'-gttaaaccggat <b>gcc</b> gtaacgattat-3' (pID62)  |
| IIGA(H261A)-R | 5'-ataatcgttac <b>ggc</b> atccggttaac-3'           |
| IIGA(H261S)-F | 5'-gttaaaccggat <b>tcg</b> taacgattat-3' (pID63)   |
| IIGA(H261S)-R | 5'-ataatcgttac <b>gga</b> tccggttaac-3'            |
| IIGA(H296A)-F | 5'-gacgcgattatt <b>gct</b> ccgaaaatgc-3' (pID64)   |
| IIGA(H296A)-R | 5'-gcatttccggag <b>ca</b> ataatcgctc-3'            |
| IIGA(H296S)-F | 5'-gacgcgattatt <b>tct</b> ccgaaaatgc-3' (pID65)   |
| IIGA(H296S)-R | 5'-gcatttccggag <b>aa</b> ataatcgctc-3'            |
| IIGA(H307A)-F | 5'-caaggctgcaaa <b>g</b> cggttcaggatcc-3' (pID66)  |
| IIGA(H307A)-R | 5'-ggatcctgaaac <b>gg</b> cttgacagccttg-3'         |
| IIGA(S286A)-F | 5'-acaacaaagct <b>ggc</b> ggcagatggagag-3' (pID67) |
| IIGA(S286A)-R | 5'-ctctccatct <b>gcc</b> gcagctttgtt-3'            |
| IIGA(D190A)-F | 5'-aaccagctgtac <b>gct</b> cctttacaaaa-3' (pID68)  |
| IIGA(D190A)-R | 5'-ttttgtaagagg <b>g</b> cgctacagctggtt-3'         |
| IIGA(D190E)-F | 5'-aaccagctgtac <b>g</b> ccctttacaaaa-3' (pID69)   |
| IIGA(D190E)-R | 5'-ttttgtaagagg <b>ctc</b> gtacagctggtt-3'         |
| IIGA(D230A)-F | 5'-atcgaacagct <b>cg</b> ctgattccttgc-3' (pID70)   |
| IIGA(D230A)-R | 5'-gcgaaaggaat <b>cag</b> cgagctgttcgat-3'         |
| IIGA(D230E)-F | 5'-atcgaacagct <b>c</b> gaggattccttgc-3' (pID71)   |
| IIGA(D230E)-R | 5'-gcgaaaggaat <b>c</b> ctcgagctgttcgat-3'         |
| IIGA(D230P)-F | 5'-atcgaacagct <b>c</b> ctgattccttgc-3' (pID72)    |
| IIGA(D230P)-R | 5'-gcgaaaggaat <b>cag</b> ggagctgttcgat-3'         |
| IIGA(D260A)-F | 5'-tgcgttaaacc <b>gg</b> tcacgtaacgatt-3' (pID73)  |
| IIGA(D260A)-R | 5'-aatcgttac <b>gtg</b> accggttaacgca-3'           |
| IIGA(D260E)-F | 5'-tgcgttaaacc <b>g</b> gacgtaacgatt-3' (pID74)    |
| IIGA(D260E)-R | 5'-aatcgttac <b>gt</b> ctccggttaacgca-3'           |
| IIGA(R164A)-F | 5'-atatgagga <b>agc</b> agtcagcgtgc-3' (pID75)     |
| IIGA(R164A)-R | 5'-gcacgctgact <b>g</b> cttctcatat-3'              |
| IIGA(R164I)-F | 5'-atatgagga <b>aat</b> agtcagcgtgc-3' (pID76)     |
| IIGA(R164I)-R | 5'-gcacgctgact <b>at</b> tctctcatat-3'             |
| IIGA(R164K)-F | 5'-atatgagga <b>aaa</b> agtcagcgtgc-3' (pID77)     |
| IIGA(R164K)-R | 5'-gcacgctgact <b>ttt</b> tctctcatat-3'            |
| IIGA(V165A)-F | 5'-tgaggaacgag <b>cc</b> agcgtgcagg-3' (pID78)     |
| IIGA(V165A)-R | 5'-cctgcacgct <b>gg</b> ctcgttctca-3'              |
| IIGA(V165P)-F | 5'-tgaggaacgag <b>ccc</b> agcgtgcagg-3' (pID79)    |
| IIGA(V165P)-R | 5'-cctgcacgct <b>ggg</b> ctcgttctca-3'             |
| IIGA(G180A)-F | 5'-tcatgtcagag <b>cc</b> ctgattgatt-3' (pID80)     |
| IIGA(G180A)-R | 5'-aatcaatcag <b>gg</b> ctctgacatga-3'             |

|                        |                                                           |
|------------------------|-----------------------------------------------------------|
| IIGA(L181A)-F          | 5'-tgtcagaggc <b>gc</b> gattgattccg-3' (pID81)            |
| IIGA(L181A)-R          | 5'-cggaatcaatc <b>gcgc</b> cctctgaca-3'                   |
| IIGA(I182A)-F          | 5'-cagaggcct <b>ggct</b> gattccggta-3' (pID82)            |
| IIGA(I182A)-R          | 5'-taccggaatcag <b>cc</b> caggcctctg-3'                   |
| IIGA(D183N)-F          | 5'-aggcctgattaattccggtaacc-3' (pID83)                     |
| IIGA(D183N)-R          | 5'-ggttaccggaattaatcaggcct-3'                             |
| IIGA(G185V)-F          | 5'-gattgattccgtaaccagctgt-3' (pID84)                      |
| IIGA(G185V)-R          | 5'-acagctggtta <b>ac</b> ggaatcaatc-3'                    |
| IIGA(H296Q)-F          | 5'-cgcgattattca <b>acc</b> gaaaatgc-3' (pID85)            |
| IIGA(H296Q)-R          | 5'-gcattttc <b>ggt</b> gaataatcgcg-3'                     |
| IIGA(H296F)-F          | 5'-cgcgattattttccgaaaatgc-3' (pID86)                      |
| IIGA(H296F)-R          | 5'-gcattttc <b>gga</b> aaaataatcgcg-3'                    |
| IIGA(G180D)-F          | 5'-cttcatgtcagag <b>ac</b> ctgattgattcc-3' (pID90)        |
| IIGA(G180D)-R          | 5'-ggaatcaatcag <b>gt</b> ctctgacatgaag-3'                |
| IIGA(I182D)-F          | 5'-gtcagaggcct <b>gat</b> gattccggtaac-3' (pID91)         |
| IIGA(I182D)-R          | 5'-ggtaccggaatc <b>atc</b> caggcctctgac-3'                |
| IIGA(Q252E)-F          | 5'-ggcagcaaaatgaattttattatgc-3' (pID92)                   |
| IIGA(Q252E)-R          | 5'-gcataataaaaattcattttgctgacc-3'                         |
| IIGA(T282E)-F          | 5'-atcggtatcagc <b>gaa</b> caaaagctgtcg-3' (pID93)        |
| IIGA(T282E)-R          | 5'-cgacagcttt <b>gttc</b> gctgataccgat-3'                 |
| IIGA(T283A)-F          | 5'-ggtatcagcacag <b>caa</b> agctgtcggca-3' (pID94)        |
| IIGA(T283A)-R          | 5'-tgccgacagcttt <b>gt</b> gtgctgatacc-3'                 |
| IIGA(I294A)-F          | 5'-gagtttgacgc <b>gct</b> attcatccgaaa-3' (pID95)         |
| IIGA(I294A)-R          | 5'-tttcggatgaat <b>agc</b> gcgctcaaaactc-3'               |
| IIGA(I295A)-F          | 5'-tttgacgcgatt <b>gct</b> catccgaaaatg-3' (pID96)        |
| IIGA(I295A)-R          | 5'-cattttcggatgag <b>ca</b> atcgcgcaaaa-3'                |
| IIGA(H296E)-F          | 5'-gacgcgattattga <b>acc</b> gaaaatgctt-3' (pID97)        |
| IIGA(H296E)-R          | 5'-aagcattttc <b>ggt</b> caataatcgcgctc-3'                |
| IIGA(H296G)-F          | 5'-gacgcgattatt <b>ggt</b> ccgaaaatgctt-3' (pID98)        |
| IIGA(H296G)-R          | 5'-aagcattttc <b>gga</b> caataatcgcgctc-3'                |
| IIGA(H296I)-F          | 5'-gacgcgattatt <b>at</b> ccgaaaatgctt-3' (pID99)         |
| IIGA(H296I)-R          | 5'-aagcattttc <b>gga</b> taataatcgcgctc-3'                |
| IIGA(K298A)-F          | 5'-attattcatcc <b>gga</b> atgctttcgggc-3' (pID100)        |
| IIGA(K298A)-R          | 5'-gcccgaaagcatt <b>g</b> ccgatgaataat-3'                 |
| IIGA(K298N)-F          | 5'-attattcatccgaatgctttcgggc-3' (pID101)                  |
| IIGA(K298N)-R          | 5'-gcccgaaagcat <b>at</b> cggatgaataat-3'                 |
| IIGA(ΔC-8)-F           | 5'-gaaaatgctttcgggatccagtaaag-3' (pID102)                 |
| IIGA(ΔC-8)-R           | 5'-ctttactggatcccgaaagcattttc-3'                          |
| IIGA(H296G<br>K298N)-F | 5'-gacgcgattatt <b>ggt</b> ccgaatgctttcgggc-3' (pID107)   |
| IIGA(H296G<br>K298N)-R | 5'-gcccgaaagcat <b>at</b> cgg <b>acca</b> ataatcgcgctc-3' |

<sup>a</sup>Bold type indicates a mutated sequence. Single underlining indicates a restriction endonuclease recognition site. Double underlining indicates a ribosome binding site.

Italics indicate a FLAG coding sequence.

<sup>b</sup>For primer pairs used for site-directed mutagenesis of pID48, the substitution in SpoIIIGA is indicated in parentheses in the name of the forward (F) and reverse (R) primers, and the name of the mutant plasmid is listed after the forward primer.

TABLE S3

*Protease inhibitors tested for inhibition of pro- $\sigma^E$  processing in E. coli*

| Inhibitor (Source)                                  | Type(s) of protease inhibited           | Concentration tested |
|-----------------------------------------------------|-----------------------------------------|----------------------|
| Complete Mini EDTA-free (Roche)                     | Serine and cysteine proteases           | One tablet per 10 ml |
| Phenylmethylsulfonyl fluoride (Boehringer Mannheim) | Serine proteases                        | 500 $\mu$ M          |
| Pefabloc (Roche)                                    | Serine proteases                        | 500 $\mu$ M          |
| Pepstatin A (Roche)                                 | Aspartic proteases                      | 10 $\mu$ M           |
| Acetyl pepstatin (Sigma)                            | Aspartic proteases                      | 10 $\mu$ M           |
| $\beta$ -secretase inhibitor IV (Calbiochem)        | $\beta$ -secretase (aspartic protease)  | 20 $\mu$ M           |
| Boc-F $\psi$ FAF-OMe <sup>a</sup>                   | $\gamma$ -secretase (aspartic protease) | 5 $\mu$ M            |
| Boc-F $\psi$ FFA-OMe                                | $\gamma$ -secretase (aspartic protease) | 5 $\mu$ M            |
| Boc-F $\psi$ FFL-OMe                                | $\gamma$ -secretase (aspartic protease) | 5 $\mu$ M            |
| Boc-F $\psi$ FLF-OMe                                | $\gamma$ -secretase (aspartic protease) | 5 $\mu$ M            |
| Boc-F $\psi$ FVF-OMe                                | $\gamma$ -secretase (aspartic protease) | 5 $\mu$ M            |
| Saquinavir <sup>b</sup>                             | HIV protease (aspartic protease)        | 100 $\mu$ M          |
| Nelfinavir                                          | HIV protease (aspartic protease)        | 100 $\mu$ M          |
| Indinavir                                           | HIV protease (aspartic protease)        | 100 $\mu$ M          |
| Amprenavir                                          | HIV protease (aspartic protease)        | 100 $\mu$ M          |
| Atazanavir                                          | HIV protease (aspartic protease)        | 100 $\mu$ M          |
| PfPM2 cci                                           | HIV protease (aspartic protease)        | 100 $\mu$ M          |
| PfPM4 cci                                           | HIV protease (aspartic protease)        | 100 $\mu$ M          |
| PmPM4 cci                                           | HIV protease (aspartic protease)        | 100 $\mu$ M          |
| PvPM4 cci                                           | HIV protease (aspartic protease)        | 100 $\mu$ M          |
| PfPM4 ssi                                           | HIV protease (aspartic protease)        | 100 $\mu$ M          |

<sup>a</sup>Peptidomimetic transition state analogs differing at P<sub>2</sub>' and P<sub>3</sub>' were a gift from M. Wolfe.

<sup>b</sup>HIV protease inhibitors were a gift from B. Dunn.

#### References:

1. Jiang, X., Rubio, A., Chiba, S., and Pogliano, K. (2005) *Mol. Microbiol.* **58**, 102-115
2. Youngman, P., Perkins, J. B., and Losick, R. (1984) *Plasmid* **12**, 1-9

## SUPPLEMENTAL FIGURE LEGENDS

**Supplemental Fig. 1.** Time-dependent processing of pro- $\sigma^E$ . Western blot analysis of pro- $\sigma^E$ (M17I)-H6/ $\sigma^E$ -H6 using antibodies against  $\sigma^E$ . *E. coli* bearing pID50 and pID48 were shaken at 120 rpm and collected at the indicated times after IPTG induction. Ten min after IPTG induction, chloramphenicol (34 mg/ml in ethanol) was added to a final concentration of 200  $\mu$ g/ml (lanes 5-8) to block protein synthesis or, as a control, the same volume of ethanol was added (lanes 1-4).

**Supplemental Fig. 2.** Similarity of *B. subtilis* SpoIIGA to aspartic proteases as detected by the HHpred algorithm. Residues S147 to P196 of SpoIIGA and short regions of known or predicted aspartic proteases (with sources indicated in parentheses) are shown with sequences matching the DS/TG sequence in bold.

**Supplemental Fig. 3.** Alignment of SpoIIGA orthologs. The predicted C-terminal intracellular domain of *B. subtilis* SpoIIGA was aligned with similar sequences (detected by BLAST analysis) (1) from the indicated bacteria using ClustalW (2). Numbers refer to residues in *B. subtilis* SpoIIGA. Stars, colons, and periods indicate identical, conserved, and semi-conserved residues.

## REFERENCES

1. Altschul, S. F., Gish, W., Miller, W., Myers, E. W., and Lipman, D. J. (1990) *J. Mol. Biol.* **215**, 403-410
2. Thompson, J. D., Higgins, D. G., and Gibson, T. J. (1994) *Nucleic Acids Res.* **22**, 4673-4680

Supplemental Fig. 1

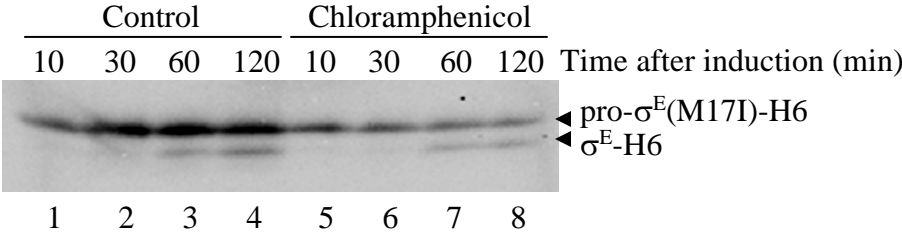



## Supplemental Fig. 2

```
Cardosin A (C. cardunculus) -----DRDTSYFGEIGIGTPPQKFTVIFDTGSSV-----
Cathepsin D (H. sapiens) -----YMDAQYYGEIGIGTPPQCFTVVFDTG-----
Candidapepsin (C. tropicalis) -----DVPTTLINEGPSYAADIVVGSNQQKQTVVIDTGSSD-----
Candidapepsin-3 (C. albicans) -----QTVPVKLINEQVSYASDITVGSNKQKLTVVVIDTGSSD-----
Retropepsin (FIV) -----TTLEKRPEILIFVNGYPIKFLLDTG-----
DDI1 protease (S. cerevisiae) -----INIEINNYPVKAFVDTG-----
HIV protease (HIV-1) -----QITLWKRPLVTIKIGGQLKEALLDTGADDTIIEEMSL
HIV protease (Synthetic) -----QITLWKRPLVTIRIGGQLKEALLDTG-----
HIV protease (HIV-2) -----QFSLWKRPVVTAYIEGQPVEVLLDTG-----
EIAV protease (EIAV) -----TYNLEKRPTTIVLINDTPLNVLLDTG-----
M-PMV protease (SRV-1) -----LTLWLDDKMFTGLINTG-----
SpoIIIGA (B. subtilis) SKRRIEDIETKNIQYEERSVQADLGSQTLHVRGLIDSGNQLYDPLTKTP
Aspartic protease (B. germanica) -----YKLVHVFINTQYAGITKIGNQNFLTTFDSTSCN-----
RSV protease (RSV) -----LVRVILTNTGSHPVKQRSVYITALLDSG-----
```

# Supplemental Fig. 3

|                                         |                                                       |     |
|-----------------------------------------|-------------------------------------------------------|-----|
| <i>Bacillus subtilis</i>                | SKRRIEDIETKNIQYEEVRSVQADLGSQTLHVRGLIDSGNQLYDPLTKTP    | 196 |
| <i>Bacillus amyloliquefaciens</i>       | SKKRIEDIETKSIQYDELVMVQAEFSGQTIKRAKGLVDSGNQLYDPLTKTP   |     |
| <i>Bacillus licheniformis</i>           | SKKRFEDAEEAKKIQYEEVRLEACIGETHLHFTGLIDSGNQLYDPIKTKTP   |     |
| <i>Bacillus anthracis</i>               | SKKRIESVEVTKIHYDQIVKVKIQLAEELLAGLIDSGNQLYDPLTKTP      |     |
| <i>Bacillus cereus</i>                  | SKKRIESVEVTKIHYDQIVKVKIQLAEELLAGLIDSGNQLYDPLTKTP      |     |
| <i>Bacillus thuringiensis</i>           | SKKRIESVEVTKIHYDQIVKVKIQLAEELLAGLIDSGNQLYDPLTKTP      |     |
| <i>Bacillus mycoides</i>                | SKKRIESVEVTKIHYDQIVKVKIQLVGEELLAGLIDSGNQLYDPLTKTP     |     |
| <i>Bacillus megaterium</i>              | SKTRVDDLRIKNITFDQLVDVEIILNEQTLMSKGLIDSGNQLYDPLTKTP    |     |
| <i>Bacillus halodurans</i>              | SKQRLETIEVKKVQYERLVDVEVWLEQSKLTIRGIIDSGNQLDQPFKAP     |     |
| <i>Geobacillus thermodenitrificans</i>  | SRRRVENIREKKLRFEHIIDVIVWDGRPLALRGLIDSGNQLDQPFKAP      |     |
| <i>Geobacillus kaustophilus</i>         | SRRRVEAIREKKLRFEYIIIEVKIIVWDGRPLMLRGLIDSGNQLDQPFKTP   |     |
| <i>Bacillus clausii</i>                 | CKQQFGAVKSKQFHASQLAEVEFWIEGIFSAPGLIDTGNRLRDLPTKMP     |     |
| <i>Clostridium tetani</i>               | LERIVSFIRDRIVLDKLIYKIDIDLKNSKKSINAFDLDGNEVLPVNTLP     |     |
| <i>Clostridium perfringens</i>          | VSGVMNYFKNRAIINNFIYDLVDCIDSEVVNIKAFDLDGNEVLPATLPL     |     |
| <i>Moorella thermoacetica</i>           | GWLKKNIWQOML-----RLPVVITFGGRHLAVKALVDTGNSLREPLSQRP    |     |
| <i>Desulfotomaculum reducens</i>        | GNWVASIWHKRMGLIDNRVPLTVNLWGNRISVQALVDTGNHLVDPLSHYP    |     |
| <i>Alkaliphilus metalliredigens</i>     | -----GYIQKQISREKVFTKILIEINGISVEVQGLVDTGNSLTDPLTNP     |     |
| <i>Clostridium thermocellum</i>         | -----DIVQQRISKEKLLMPLKIAFGNGTIELFALVDTGNSLCDPLTNSP    |     |
| <i>Pelotomaculum thermopropionicum</i>  | GRGFSALVKKGCFDGLFKIPLSVKSEKQVKLEALLDGTGNHLKDLPLTRHP   |     |
| <i>Syntrophomonas wolfei</i>            | GIFGQKYLRLQVLPALLRFDVLELRFNHYHCQKGFGLDGTGNLRLDPIITNR  |     |
| <i>Oceanobacillus iheyensis</i>         | TKRRMDEHVGEQIKYDQMCVFLTLNQKVVQSKGYIDSGNQLYDPLTKRP     |     |
| <i>Carboxydotherrmus hydrogenoform</i>  | GEYAYKQYQRIIVRLKKYGFSLIEIVYSGKKVTVQSFGLDGTGNRLYDPLGWP |     |
| <i>Thermoanaerobacter tengcongensis</i> | LFLNWDYVVKKAKQDKMKYEIYIEIFGKKVKTYGFVDTGNKLFDPPLSNLP   |     |
| <i>Symbiobacterium thermophilum</i>     | AQLLWQAYRERAEVDDGLYELEVRVDGRREVVEGLVDSGNLLRTPVGRMP    |     |
| <i>Desulfitobacterium hafniense</i>     | AWHRILGSTARHQASIIDLEIDMGGQGNPFRVKALLDGTGNQLRDLPTGYP   |     |
| <i>Clostridium difficile</i>            | LKYIYKDLKMLKYIKELTKTININLLEKSFCKKALVDSGNLLKDPISQSD    |     |

: . :\*:\*\* \* \*

|                                         |                                                      |     |
|-----------------------------------------|------------------------------------------------------|-----|
| <i>Bacillus subtilis</i>                | VMIIYIDKLEPIFGTAETMIIRNTDPLEAIEQLDDSF---RFLDKMLRIP   | 243 |
| <i>Bacillus amyloliquefaciens</i>       | VMILCIDKFPILSEKETDLIKSASPLEVIEQLDDSF---RHADKRLRIP    |     |
| <i>Bacillus licheniformis</i>           | VMIVNIEKLVVVLGEEASVTIKEMSPLDAVGKLEAL---PYIGRIRLIP    |     |
| <i>Bacillus anthracis</i>               | VMIMHISSEHCLPAWLTEQIYSKTEIPQIPENDS-----GWATKRLRIP    |     |
| <i>Bacillus cereus</i>                  | VMIMHISSEHCLPAWLTEQIYSKTEIPQIPENDS-----GWATKRLRIP    |     |
| <i>Bacillus thuringiensis</i>           | VMIMHISSEHCLPAWLTEQIYSKTEIPQIPENDS-----GWATKRLRIP    |     |
| <i>Bacillus mycoides</i>                | VMIMHISSEHCLPVWLTEQIYSKTEIPQIPENDS-----GWATKRLRIP    |     |
| <i>Bacillus megaterium</i>              | VMIVTADSLKEILPEGLMELSKNVQSFSSHSEDIDQ-----EWYSKRVFVP  |     |
| <i>Bacillus halodurans</i>              | VMIIQADVLRGQIPDEWIEQMLNVEISIG-TTDGDE-----RFMRMSVIP   |     |
| <i>Geobacillus thermodenitrificans</i>  | VMVVDREKAKEVLPPEELT-MHMTMTFDLPE-----QWAHRLRLIP       |     |
| <i>Geobacillus kaustophilus</i>         | VMVVEQEAKAVLPEELGCLSSPMLLASPE-----RWHRLRLIP          |     |
| <i>Bacillus clausii</i>                 | VMVAEALLYSAFGKQVQDALLELEAENEPSP-----LMKRVRRLIP       |     |
| <i>Clostridium tetani</i>               | VIVVEKDIFQKNE-----IEDYDVTYIIP                        |     |
| <i>Clostridium perfringens</i>          | VIIAEREKFRGVN-----IKEKDQFRIP                         |     |
| <i>Moorella thermoacetica</i>           | VIIIVEYSALKEIMPPEIIKAYDSQGGFDLDSLVSNSLAA-TPWATRLRIP  |     |
| <i>Desulfotomaculum reducens</i>        | VIIIMEYEAIAKPLLPNEISRLYSEGISQDGSMDLTLLSA-SPYAQRRLRIP |     |
| <i>Alkaliphilus metalliredigens</i>     | VIIIVEYEAITNLLPEEVKRIFNQSTTIDYKQVALLLDN-QSWMTRIRMIIP |     |
| <i>Clostridium thermocellum</i>         | VVVVEFNAIKNILPMEIQRIFDESKENDLDSVTKIVSD-SKWSRFRRLIP   |     |
| <i>Pelotomaculum thermopropionicum</i>  | VVVVEYAAALKPLLPPEVQACFEKEGEPDVWQIILNLLGE-KRFAGRFSAVP |     |
| <i>Syntrophomonas wolfei</i>            | VIVAEYQFLKSCPELDREVLEIKQDENTMLDALGG---CSWANRLRIP     |     |
| <i>Oceanobacillus iheyensis</i>         | VIIICDRTFLKEWFTEDEWLQLEKAKNNLDMDEIPKR-----WQDKIQIIP  |     |
| <i>Carboxydotherrmus hydrogenoform</i>  | VVVVEYRAVKKIILPVDFQFQS-----KTIRRIIP                  |     |
| <i>Thermoanaerobacter tengcongensis</i> | VVVVAYSSVKSLLPYDLEEFVAEGKIDFGKVLEIKD---EKWHSRIGIIP   |     |
| <i>Symbiobacterium thermophilum</i>     | VAVVEGGRLRSLPPAVLEAASSGPMGLDGLP-----AEWQSRQQLVP      |     |
| <i>Desulfitobacterium hafniense</i>     | VILIEEEAAAAGVPEELLVPLQAWRDLDDPWPWLWQSDSLWIKQCAFIP    |     |
| <i>Clostridium difficile</i>            | VIIIVKSSVLEGFIPKELLNINYEDINMKKAQEIIGSLD-DKTSGRVRIIP  |     |

\* : \*

*Bacillus subtilis*  
*Bacillus amyloliquefaciens*  
*Bacillus licheniformis*  
*Bacillus anthracis*  
*Bacillus cereus*  
*Bacillus thuringiensis*  
*Bacillus mycoides*  
*Bacillus megaterium*  
*Bacillus halodurans*  
*Geobacillus thermodenitrifican*  
*Geobacillus kaustophilus*  
*Bacillus clausii*  
*Clostridium tetani*  
*Clostridium perfringens*  
*Moorella thermoacetica*  
*Desulfotomaculum reducens*  
*Alkaliphilus metalliredigens*  
*Clostridium thermocellum*  
*Pelotomaculum thermopropionicum*  
*Syntrophomonas wolfei*  
*Oceanobacillus iheyensis*  
*Carboxydotherrmus hydrogenoform*  
*Thermoanaerobacter tengcongensis*  
*Symbiobacterium thermophilum*  
*Desulfitobacterium hafniense*  
*Clostridium difficile*

YRGVGG-QNQFLLCVKPDHVTIM-TKEEMISADKCLIGISTTKLSADGEF 291  
YRGVGG-DNQFLLCLKPDYVTIL-TKDEMIACEKCLIGISTKPLSADGEF  
YRGVGH-QHQFLLCLKPDHVLVC-TEREVIEAPKCLIGISTSPLSADGEF  
FRAVGV-ENQFLWAIKPEVSVQIY-HEGSSIVVNKVLIGLNTQQLSTNGEY  
FRAVGV-ENQFLWAIKPEVSVQIY-HEGSSIVVNKVLIGLNTQQLSTNGEY  
FRAVGV-ENQFLWAIKPEVSVQIY-HEGSSIVVNKVLIGLNTQQLSTNGEY  
FRAVGV-ENQFLWAIKPEVSVQIY-HEGSSIVVNKVLIGLNTQQLSTNGEY  
YRSVGG-ANQLLLALKPDMVRLV-HQSNTIEVTKVLVGI-SHTTLSVEKQY  
YRAVGS-GPQMMMAIKPDRIMLL-YEDQWLEVKQGLVALSANSLSSTGEY  
YRAVGS-GSQMMAAVKPDRIMLR-YENEWLEVAQGLVALSADPLSTDGEY  
YRAVGG-GSSYMAALKPDRVKIR-YQNEAYETNHVLIIGLSRETLSPEQHY  
FSVVNG-DRGMLKAIKPEMVSIIY-KKR-EIEKKEVLIASFDDKLSSSGDY  
YKVVGD-NSGYMKGIKIDNIKLC-NVNGETMTRDAILCFCDNKLSKEGEY  
YHSLGQ-ERGMLLGLRPDEVVIV-TGQGMKVKVLEVLIGLYRERLSPEGNY  
FHSLGN-NHGMLLGI RPDIEVC-YKNKIQRIQNVVVGIIYEKKLSPGTTY  
FQALGT-ENGMLVGFKPDVRSIE-NNSIMKETQDTIIAIYHKKLSKNEDY  
FTSLGK-ENGMLIGFRPDYIEVG-ENAEKKGITDVIIGIYNRALSKNNNY  
FQSLSR-IGGLMVGYPDEVIIE-QKGRQLRAEKVLAIIYHSSLDPGNSY  
FSSIGK-KNGILLGVRADIEVVN-NGSKDVFHQNMVVGIIYKELSSQGEY  
YQGVGD-GSSMMIGIRPERVIVN-YNDQQLLATNVIIGIQFGNLVRDDSY  
FRGVGR-GQGFVWFIFDELKIW-QEGEVIRVKRAVVAITFQSLN--SEF  
FSGVG--TKGLLLGIRPDRLIIN-GKE----IKDVMLGIS-----TDKME  
FAAVGR-SDGWLLVIRPDGLSVRPRGRGDWVQVEGRVGLAAGPLDPEGRY  
YQGVG--HKSULLGIRPQKVVCT--SLSEPREMKATLAFVVRQVLSPDRAY  
YKHAGSNKTSIIIGLKADYIEVD-----EQKIGNIILGISNFNDREY  
: . : : : :

*Bacillus subtilis*  
*Bacillus amyloliquefaciens*  
*Bacillus licheniformis*  
*Bacillus anthracis*  
*Bacillus cereus*  
*Bacillus thuringiensis*  
*Bacillus mycoides*  
*Bacillus megaterium*  
*Bacillus halodurans*  
*Geobacillus thermodenitrifican*  
*Geobacillus kaustophilus*  
*Bacillus clausii*  
*Clostridium tetani*  
*Clostridium perfringens*  
*Moorella thermoacetica*  
*Desulfotomaculum reducens*  
*Alkaliphilus metalliredigens*  
*Clostridium thermocellum*  
*Pelotomaculum thermopropionicum*  
*Syntrophomonas wolfei*  
*Oceanobacillus iheyensis*  
*Carboxydotherrmus hydrogenoform*  
*Thermoanaerobacter tengcongensis*  
*Symbiobacterium thermophilum*  
*Desulfitobacterium hafniense*  
*Clostridium difficile*

DAIIHPKMLSGKAVKHVS----- 309  
DGIVHPKMLTGKAVKHVS-----  
DAIVHPKMLAGNPVKHVS-----  
QCIVHPKMLISQKMVIA-----  
QCIVHPKMLISQKMVIA-----  
QCIVHPKMLISQKMVIA-----  
QCIVHPKMLISQKMVIA-----  
ECIVHPKLIVIGEVSAS-----  
QCIVHPKMIVHGITDKLA-----  
SCIVHPKMVQSGKLTAS-----  
DCIVHPKMVQAGRKLTAS-----  
RCIVHPQIMHEYAS-----  
RALLSRGIIIF-----  
EALLSRGII-----  
RALLHPDLLELSMSF-----  
RALLHPQLLAF-----  
RALLHPDLV-----  
SALLSPELI-----  
HALVGPPELIGL-----  
QFLIPAEIENA-----  
HCLLHPQIMKQSIHSA-----  
QALLSEEILKSA-----  
FALLNPEIMG-----  
AALLPTAMIAAARRAHGRARGPVEAQSGERGEGRPDVHVR  
QALLHPEHVQGAES-----  
GAIMNPNILPGF-----  
: :
